# Supplementary material for: Reducing Cannabis Use in Young Adults With Psychosis Using iCanChange, a Mobile Health App: Protocol for a Pilot Randomized Controlled Trial (ReCAP-iCC)
Source: PubMed Central journal article supplement (PMC9736767; doi:10.2196/40817), 2022-11-25
Supplement: resprot_v11i11e40817_app1.pdf [file resprot_v11i11e40817_app1.pdf]

## Appendix 1. Push notification schedule iCC

Advice corresponds to screens that appear in the application during the intervention but are not linked to push notifications.

Reminders correspond to push notifications. Each reminder has the same title: Hello [first name]

| Type             | Time                                                      | Condition                                                    | Content                                                                                                                                                                                                                                                                                                                                                                                                                                                                                                            |
|------------------|-----------------------------------------------------------|--------------------------------------------------------------|--------------------------------------------------------------------------------------------------------------------------------------------------------------------------------------------------------------------------------------------------------------------------------------------------------------------------------------------------------------------------------------------------------------------------------------------------------------------------------------------------------------------|
| <b>Section 1</b> |                                                           |                                                              |                                                                                                                                                                                                                                                                                                                                                                                                                                                                                                                    |
| Reminder         | 1 day after the first journal entry (in the introduction) | Only if the first module was not started OR completed        | The introduction module is available                                                                                                                                                                                                                                                                                                                                                                                                                                                                               |
| Reminder         | 1 day after module 1 was started                          | Only if module 1 was not completed                           | The introduction module is available. You can continue!                                                                                                                                                                                                                                                                                                                                                                                                                                                            |
| Reminder         | 3 days after the last module was completed                | Only if module X was not started or completed                | The module on “Cannabis Dependence” is waiting for you<br>The module on “Cannabis Myths” is waiting for you<br>The module on “Benefits of Reducing” is waiting for you<br>The module on “Believe in Your Strengths” is waiting for you<br>The module on “Triggers” is waiting for you<br>The module on “Withdrawal” is waiting for you<br>The module on “Craving” is waiting for you<br>The module on “Cannabis and Psychosis” is waiting for you<br>The module on “Choose a Cannabis Use Goal” is waiting for you |
| Reminder         | 1 day after module X was started                          | Only if module X was not completed                           | Don’t forget to finish your module                                                                                                                                                                                                                                                                                                                                                                                                                                                                                 |
| Advice           | Anytime during the intervention period (sections 1 and 2) | If less that 2 days have elapsed between modules             | You are fast! For iCanChange to be more effective, it is recommended to wait 2 days between modules or strategies in order to take the time to integrate and practice the new info.                                                                                                                                                                                                                                                                                                                                |
| Advice           | Anytime during the intervention period (sections 1 and 2) | If more than 3 modules are completed on the same day         | Wow, you’re really fast! There’s no rush... Take the time to practice the new modules or strategies.                                                                                                                                                                                                                                                                                                                                                                                                               |
| Reminder         | 1 week after completing section 1                         |                                                              | You can redo all the modules in Section 1                                                                                                                                                                                                                                                                                                                                                                                                                                                                          |
| Reminder         |                                                           | If more than 3 days have elapsed from the last journal entry | Don’t forget to use your journal to keep track of your cannabis use                                                                                                                                                                                                                                                                                                                                                                                                                                                |
| Reminder         | Every 8th day                                             | Only if the journal is not completed for the previous 7 days | Writing in your journal can help you better understand your cannabis use                                                                                                                                                                                                                                                                                                                                                                                                                                           |

**Section 2**

|          |                                                                                          |                                                                   |                                                                            |
|----------|------------------------------------------------------------------------------------------|-------------------------------------------------------------------|----------------------------------------------------------------------------|
| Reminder | 3 days after completing module 10 in section 1                                           |                                                                   | Did you start working toward your goal?                                    |
| Reminder | 4 days after completing module 10 in section 1                                           | Only if no strategy has been started or completed                 | Applying a strategy could help you on a day-to-day basis                   |
| Reminder | 6 days after completing module 10 in section 1                                           | N/A                                                               | Experiencing withdrawal symptoms? Redoing the withdrawal module could help |
| Reminder | 8 days after completing module 10 in section 1                                           |                                                                   | Are you having cravings? Redoing the craving module could help.            |
| Reminder | 2 weeks after completing module 10 from section 1 and 4 weeks after completing module 10 |                                                                   | How is your cannabis use goal coming along? Good, we hope!                 |
| Reminder | 1 week after completing strategy “Doing cannabis-free activities”                        |                                                                   | Have you done cannabis-free activities?                                    |
| Reminder | 1 week after completing strategy “Getting social support”                                |                                                                   | Don’t forget that there are people around you who can help.                |
| Reminder | 1 week after completing strategy “Taking care of yourself”                               |                                                                   | How is your healthy mind in a healthy body goal coming along?              |
| Reminder | 1 week after completing strategy “Managing your stress”                                  |                                                                   | N/A                                                                        |
| Reminder | 1 week after completing the strategy “Finding solutions to your problems”                | Every problem has a solution. Take time to find it                |                                                                            |
| Reminder | 1 week after completing the strategy “Communicating effectively”                         | Practicing new communication strategies helps                     |                                                                            |
| Reminder | 1 week after completing the strategy “Being assertive”                                   | Don’t hesitate to say what you’re thinking and to assert yourself |                                                                            |
| Reminder | 1 week after completing the strategy “Valuing and rewarding yourself”                    | Don’t forget to reward yourself for your efforts                  |                                                                            |
| Reminder | 1 week after completing the last strategy                                                | Reapplying a strategy can help you reach your goal                |                                                                            |
| Reminder | 3 days after the last strategy was completed                                             | Only if strategy X was not started                                |                                                                            |
| Reminder | 1 day after strategy X was started                                                       | Only if strategy X was not completed                              | The last strategy you started is waiting for you!                          |
