# Supplementary material for: Reducing Cannabis Use in Young Adults With Psychosis Using iCanChange, a Mobile Health App: Protocol for a Pilot Randomized Controlled Trial (ReCAP-iCC)
Source: PubMed Central journal article supplement (PMC9736767; doi:10.2196/40817), 2022-11-25
Supplement: resprot_v11i11e40817_app2.pdf [file resprot_v11i11e40817_app2.pdf]

## Appendix 2. iCC Badges

| Section 1                                                                                                                    |  |
|------------------------------------------------------------------------------------------------------------------------------|--|
| 1. Introduction                                                                                                              |  |
| <b>Engagement badge</b> - congratulate user for beginning the intervention                                                   |  |
| 2. Cannabis dependence                                                                                                       |  |
| 3. Cannabis myths                                                                                                            |  |
| 4. Benefits of reducing                                                                                                      |  |
| 5. Believe in your strengths                                                                                                 |  |
| 6. Triggers                                                                                                                  |  |
| <b>Explorer badge</b> - for reflecting about personal reasons to change cannabis use and identifying their strengths         |  |
| 7. Withdrawal                                                                                                                |  |
| 8. Craving                                                                                                                   |  |
| 9. Cannabis and psychosis                                                                                                    |  |
| 10. Choose a cannabis use goal                                                                                               |  |
| <b>Courage badge</b> - for having the determination to choose an objective related to cannabis use                           |  |
| Section 2                                                                                                                    |  |
| Supplementary module: Return to objective                                                                                    |  |
| <b>Objective met – If the participant reports achieving the cannabis consumption objective</b>                               |  |
| 1. Doing cannabis-free activities                                                                                            |  |
| 2. Getting social support                                                                                                    |  |
| 3. Taking care of yourself                                                                                                   |  |
| 4. Managing your stress                                                                                                      |  |
| <b>Persistence badge*</b> - for their constant participation in the intervention and work towards achieving their objectives |  |
| 5. Finding solutions to your problems                                                                                        |  |
| 6. Communicating effectively                                                                                                 |  |
| 7. Being assertive                                                                                                           |  |
| 8. Valuing and rewarding yourself                                                                                            |  |
| <b>Skilled user badge</b> - for achieving new knowledge and skills related to reducing cannabis use                          |  |
| 9. My journey (end of 12 weeks intervention)                                                                                 |  |
| <b>iCanChange champion</b> - for successfully completing the intervention                                                    |  |

Note: \* this badge will be unlocked after the fourth strategy explored but not specifically after “Manage my stress” because the strategies can be done in any order.

| Badge name                 | Message                                                                                                                                                                                                    |
|----------------------------|------------------------------------------------------------------------------------------------------------------------------------------------------------------------------------------------------------|
| <b>Engagement</b>          | Congratulations on completing the first module. The first step is always the hardest!                                                                                                                      |
| <b>Explorer</b>            | Good work! You’ve thought about personal reasons for change and know your strengths. You can continue exploring!                                                                                           |
| <b>Courage</b>             | You have chosen the goal that best suits you. This is a big step. Congratulations!                                                                                                                         |
| <b>Objective met</b>       | Wow, you achieved your consumption goal! CONGRATULATIONS!<br>With your perseverance and ability to sustain efforts you will be able to achieve many other goals in your life; maybe another badge?         |
| <b>Persistence</b>         | Bravo, you are still with iCanChange. You are a persevering and curious person. You spend time and energy to reach your consumption goal. Great victories are won step by step. You’re on the right track. |
| <b>Skilled user</b>        | Applause! You are now better equipped to meet your cannabis use goals.                                                                                                                                     |
| <b>iCanChange Champion</b> | Bravo, you have maintained your focus and attention until the end, and you have completed the intervention. You are a champion iCanChange!                                                                 |

Note: If in the final module the participant reports that the cannabis consumption objective was achieved, two badges are unlocked: Objective met and iCanChange Champion
