# Supplementary material for: Reducing Cannabis Use in Young Adults With Psychosis Using iCanChange, a Mobile Health App: Protocol for a Pilot Randomized Controlled Trial (ReCAP-iCC)
Source: PubMed Central journal article supplement (PMC9736767; doi:10.2196/40817), 2022-11-25

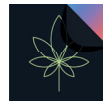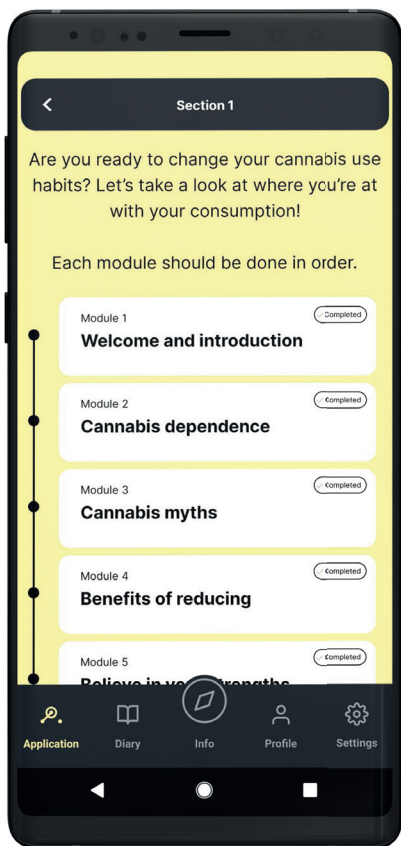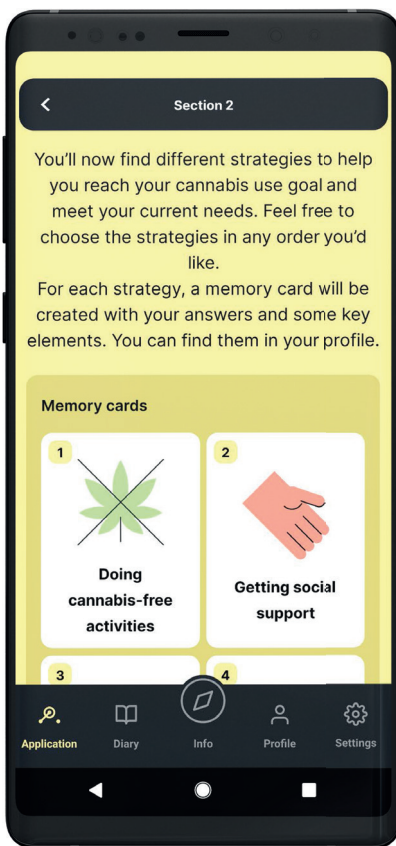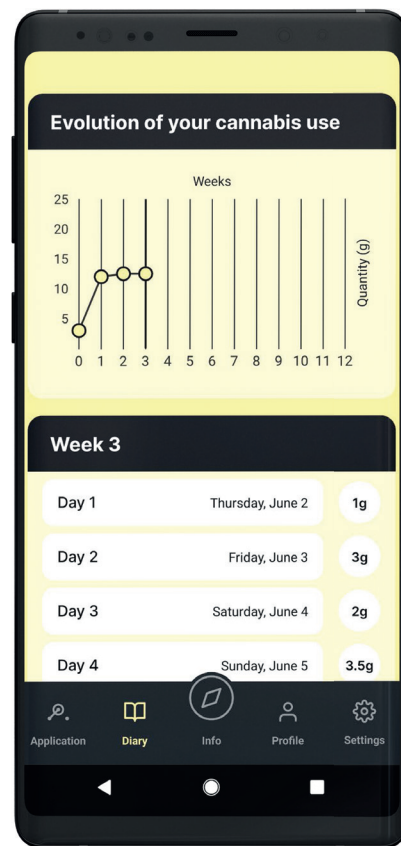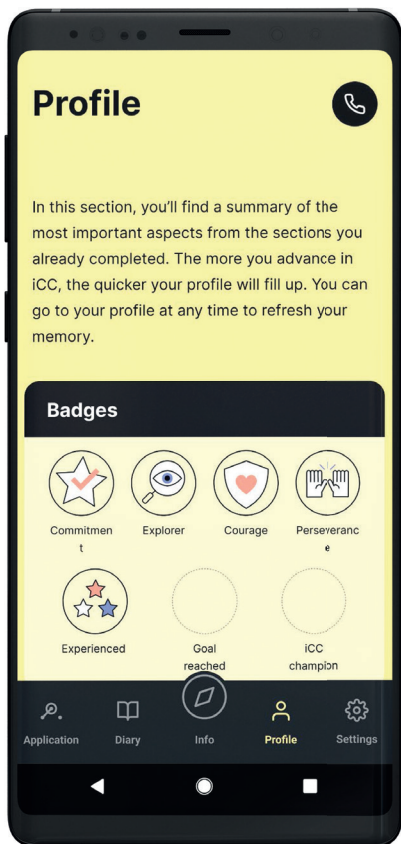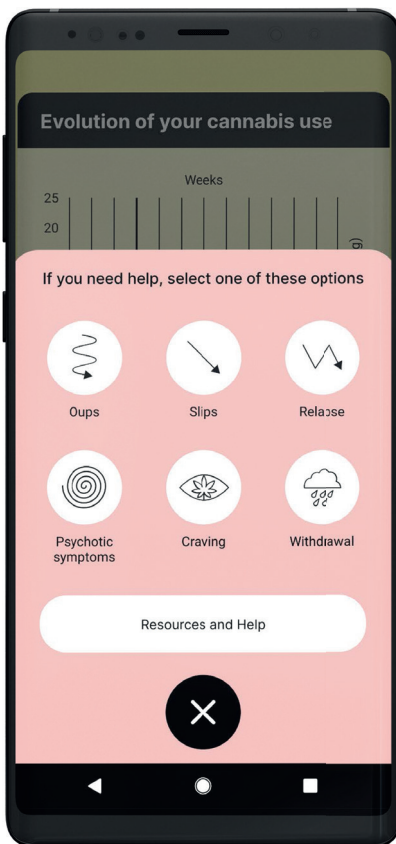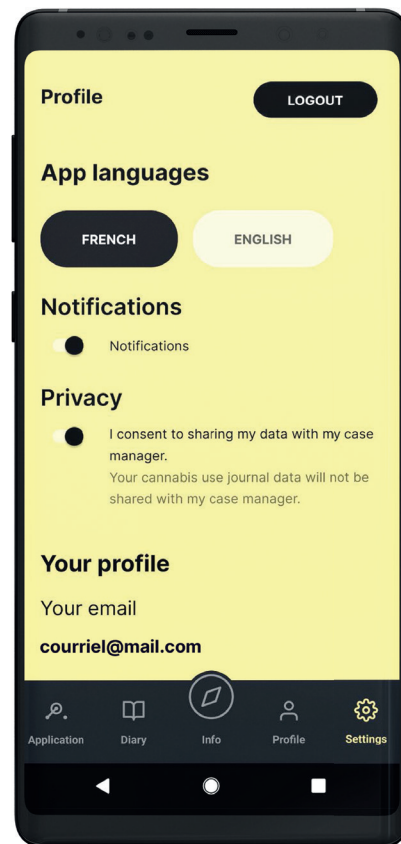

Supplement: resprot_v11i11e40817_app3.pdf [file resprot_v11i11e40817_app3.pdf]
